# Supplementary material for: Mechanistic Investigation of WWOX Function in NF-kB-Induced Skin Inflammation in Psoriasis
Source: MDPI journal article supplement (doi:10.3390/ijms25010167), 2023-12-21
Supplement: s1 [file s1]

## Supplementary Information

# Mechanistic Investigation of WWOX Function in NF- $\kappa$ B-induced Skin Inflammation in Psoriasis

Min Jeong Shin <sup>1,†</sup>, Hyun Sun Kim <sup>2,†</sup>, Pyeongan Lee <sup>2</sup>, Na Gyeong Yang <sup>1</sup>, Jae Yun Kim <sup>1</sup>, Yun Su Eun <sup>1</sup>, Whiin Lee <sup>1</sup>, Doyeon Kim <sup>3</sup>, Young Lee <sup>3</sup>, Kyung Eun Jung <sup>3</sup>, Dongkyun Hong <sup>3</sup>, Jung Min Shin <sup>3</sup>, Sul Hee Lee <sup>5</sup>, Sung Yul Lee <sup>1</sup>, Chang Deok Kim <sup>3,4,\*</sup> and Jung Eun Kim <sup>1,\*</sup>

<sup>1</sup> Department of Dermatology, College of Medicine, Soonchunhyang University Cheonan Hospital, Cheonan, 731151, Republic of Korea

<sup>2</sup> Department of Dermatology, Soonchunhyang University Graduate School of Medicine, Asan, 31538, Republic of Korea

<sup>3</sup> Department of Dermatology, School of Medicine, Chungnam National University Hospital, Daejeon, 35015, 11 Republic of Korea

<sup>4</sup> Department of Medical Science, School of Medicine, Chungnam National University, Daejeon, 35015, Republic of Korea

<sup>5</sup> Department of Dermatology, College of Medicine, Soonchunhyang University Bucheon Hospital, Bucheon, 1514584, Republic of Korea

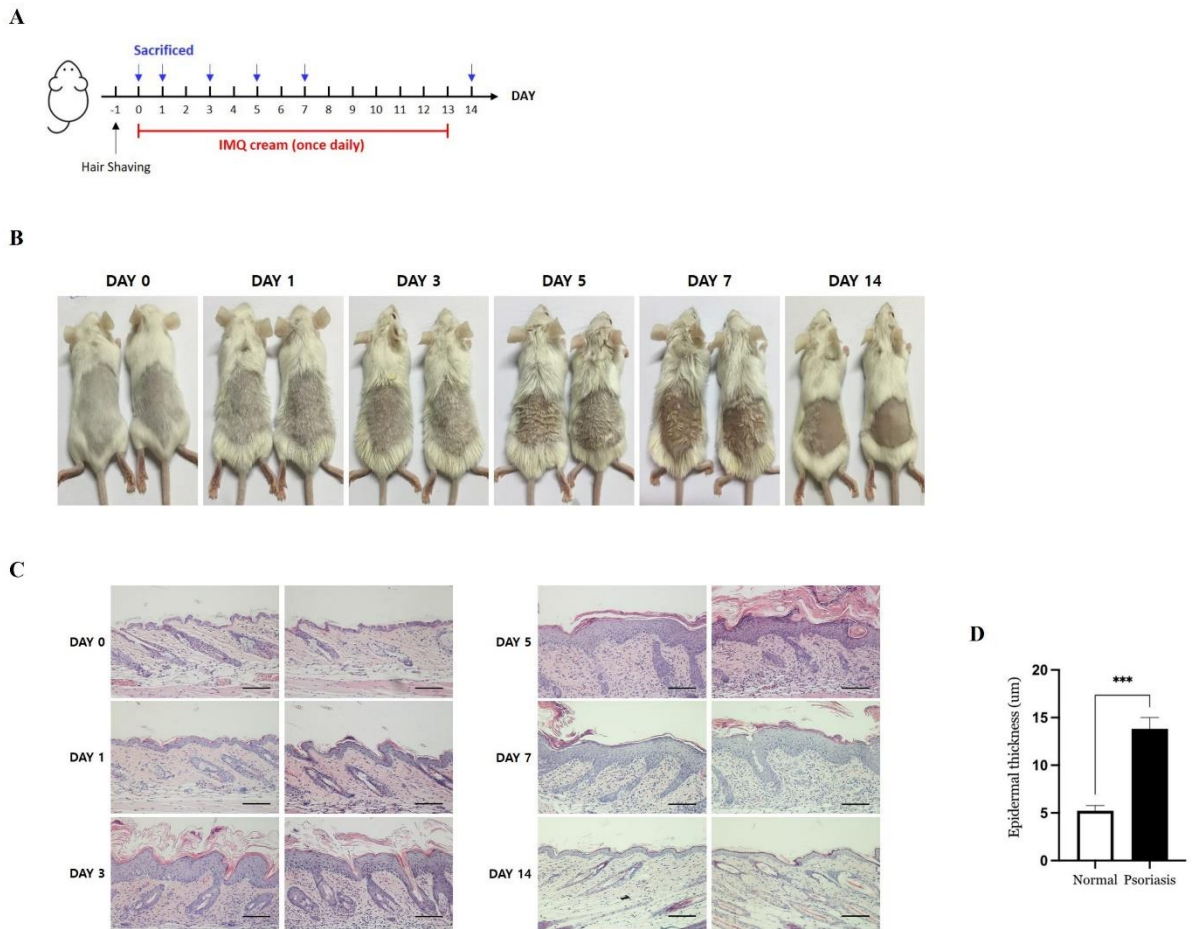

**Figure S1.** (A) Timeline of the imiquimod-induced psoriasis mouse model. (B) Representative images of the back skin from the IMQ-induced mice model at different time points. (C) Representative Hematoxylin and Eosin staining findings of the back skin from the IMQ-induced mice model at different time points. (n = 2, Magnification: 200X, Scale bar = 100 $\mu$ m) (D) Histogram of Epidermal thickness of day 5. Data are presented as mean  $\pm$  SEM (n = 5). Student's t-test was performed for statistical analysis. \*  $P < 0.05$ .

[WVVOX - Chronic plaque psoriasis: lesional and non-lesional skin punch biopsies](#)  
Annotation: [WVVOX](#), WW domain-containing oxidoreductase  
Organism: Homo sapiens  
Reporter: [GPL570](#), 221147\_x\_at (ID\_REF), [GDS5392](#), 51741 (Gene ID)  
DataSet type: Expression profiling by array, transformed count, 8 samples  
ID: 124567731

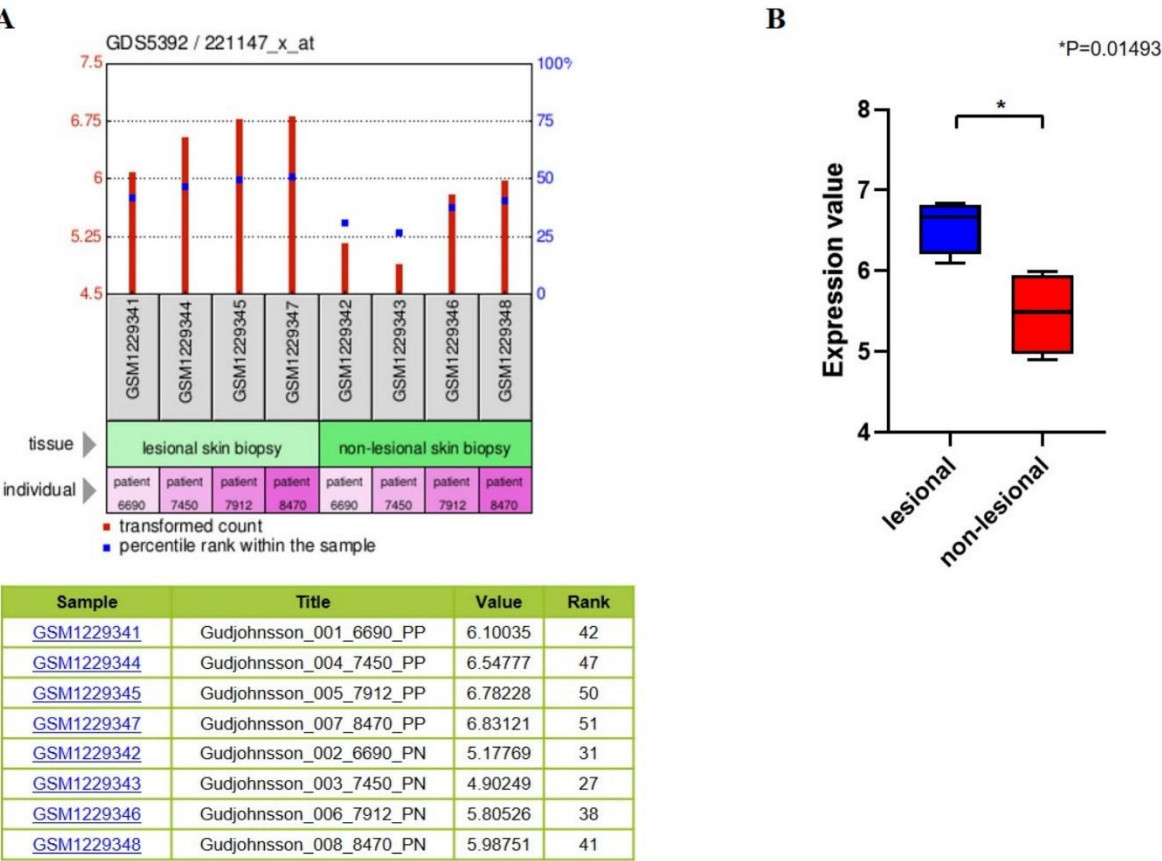

**Figure S2.** (A) Processed microarray data were obtained from Gene Expression Omnibus. (B) Transcript levels in lesional area were compared to levels in non-lesional area.

**A.**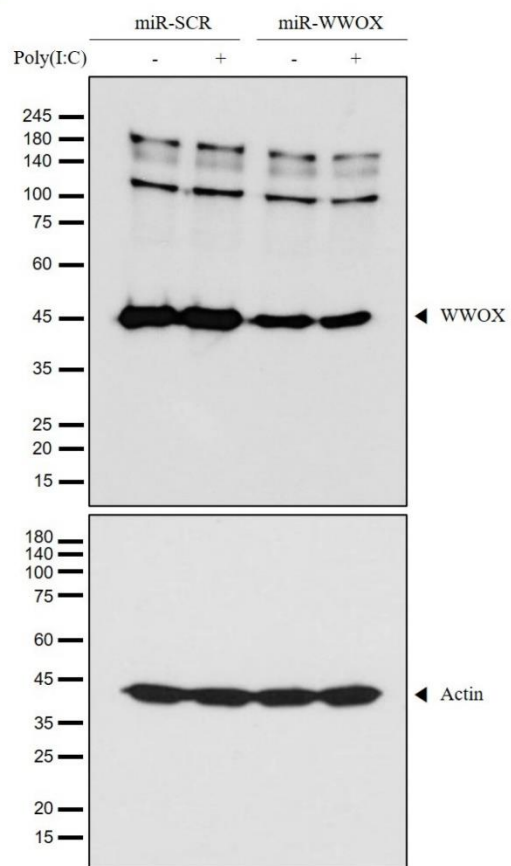**B.**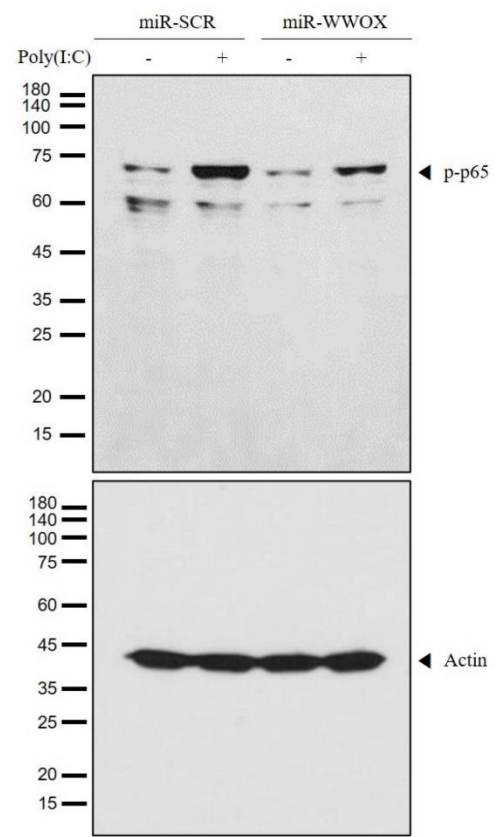

**Figure S3.** Uncropped data for Figure 2.

A.

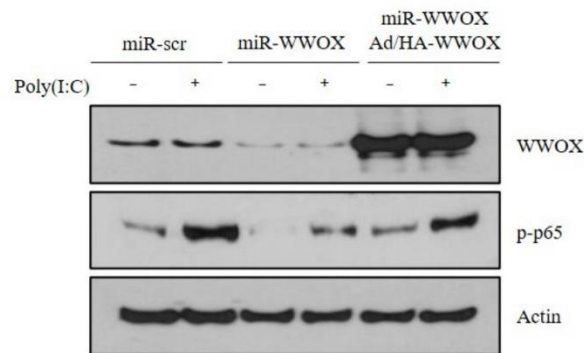

B.

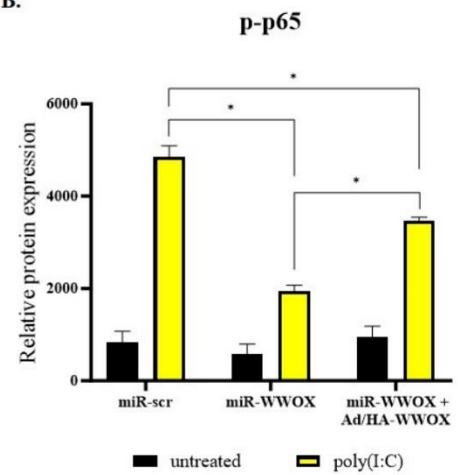

**Figure S4.** Rescue Experiment by overexpression of WWOX in SV-keratinocyte. (A) The rescue experiment of Western blot showed that overexpression of WWOX increased p-p65 (NF- $\kappa$ B marker), which was decreased by WWOX knockdown. (B) Histogram of relative protein expression. Data are presented as mean  $\pm$  SEM ( $n = 3$ ). Student's t-test was performed for statistical analysis. \*  $P < 0.05$ .

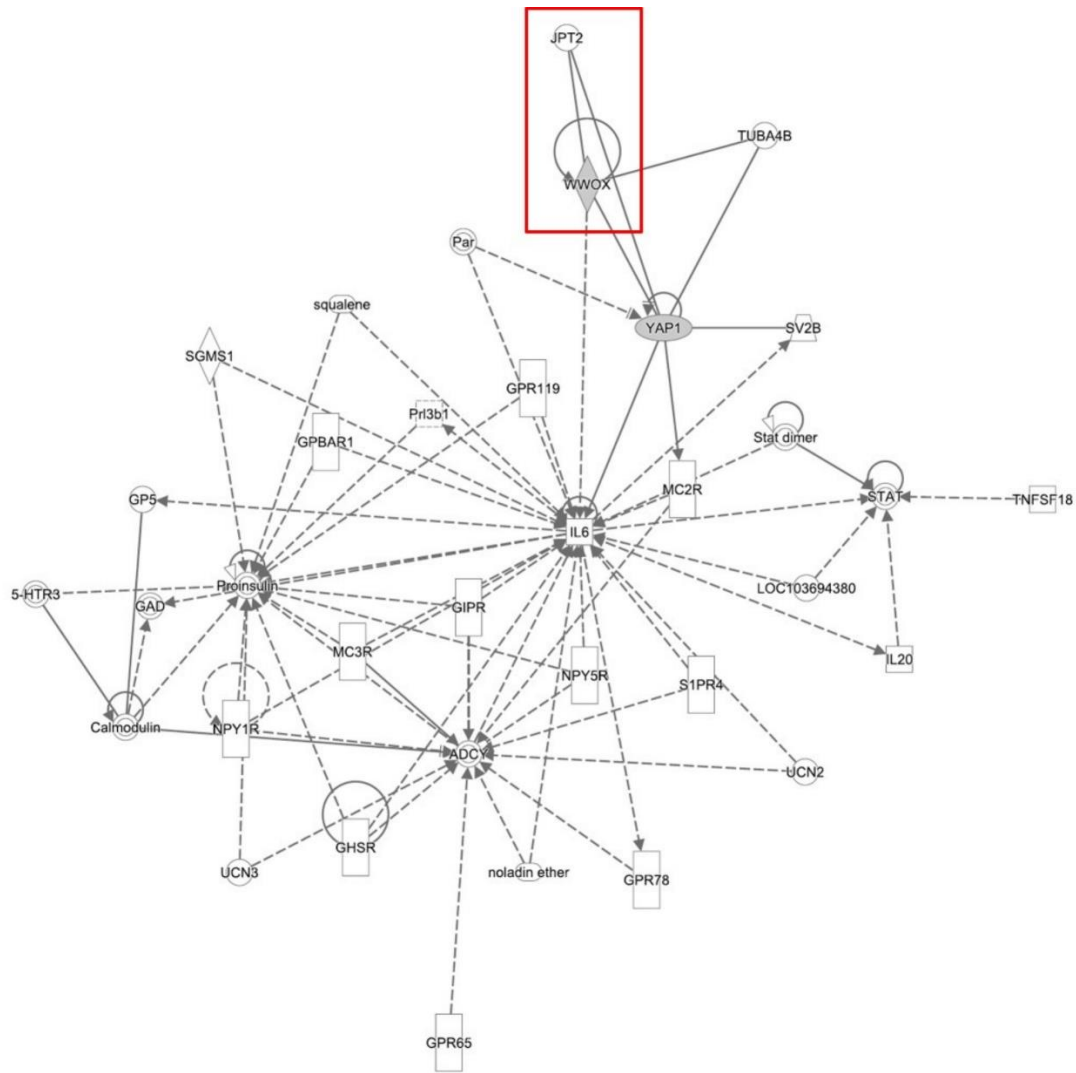

**Figure S5.** Ingenuity Pathway Analysis (IPA) was performed to find WWOX-interacting proteins. It is predicted that WWOX could interact with JPT2 (red box).

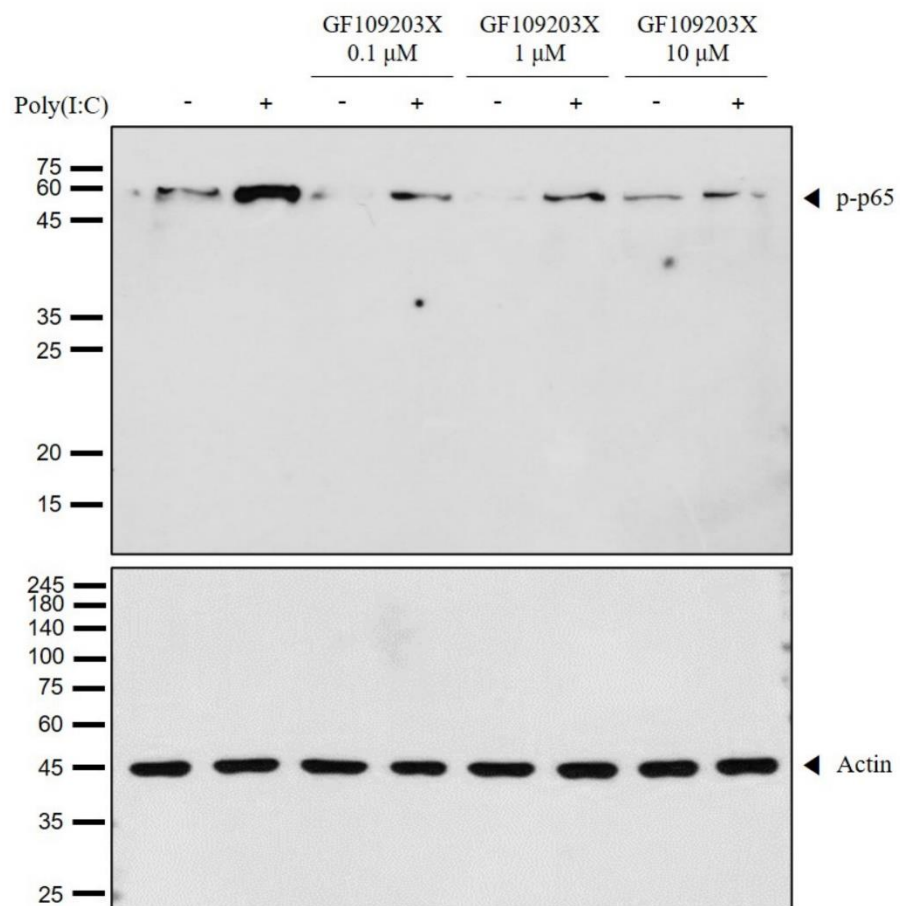

**Figure S6.** Uncropped data for Figure 5E.
